# Supplementary material for: Seeded growth of gold-based nanoscale homojunctions via controlled etching regrowth and their applications for methanol oxidation reaction
Source: Royal Society of Chemistry journal article supplement (doi:10.1039/d2ce01573k), 2022-12-22
Supplement: d2ce01573k1.pdf [file d2ce01573k1.pdf]

Supporting Information

# Seeded Growth of Gold-based Nanoscale Homojunctions *via* Controlled Etching-Regrowth and Their Applications for Methanol Oxidation Reaction

Quansen Wu,<sup>a</sup> Gongguo Zhang,<sup>b</sup> Yingying Wang,<sup>c\*</sup> Yaqi Jiao,<sup>b</sup> Yanyun Ma,<sup>d</sup> and Yiqun Zheng<sup>b\*</sup>

<sup>a</sup> School of Engineering, Jining University, Qufu, Shandong 273155, China

<sup>b</sup> School of Chemistry, Chemical Engineering, and Materials, Jining University, Qufu, Shandong 273155, China

<sup>c</sup> Health Management Department, Shandong Vocational College of Light Industry, Zibo, 255300, P. R. China

<sup>d</sup> Institute of Functional Nano & Soft Materials (FUNSOM), Jiangsu Key Laboratory of Advanced Negative Carbon Technologies, Soochow University, Suzhou, 215123, Jiangsu, China

\* Corresponding authors: Prof. Dr. Y. Zheng, E-mail: [whzyq@163.com](mailto:whzyq@163.com); Prof. Dr. Y. Wang, E-mail: [hxwyy2005@mail.sdu.edu.cn](mailto:hxwyy2005@mail.sdu.edu.cn)

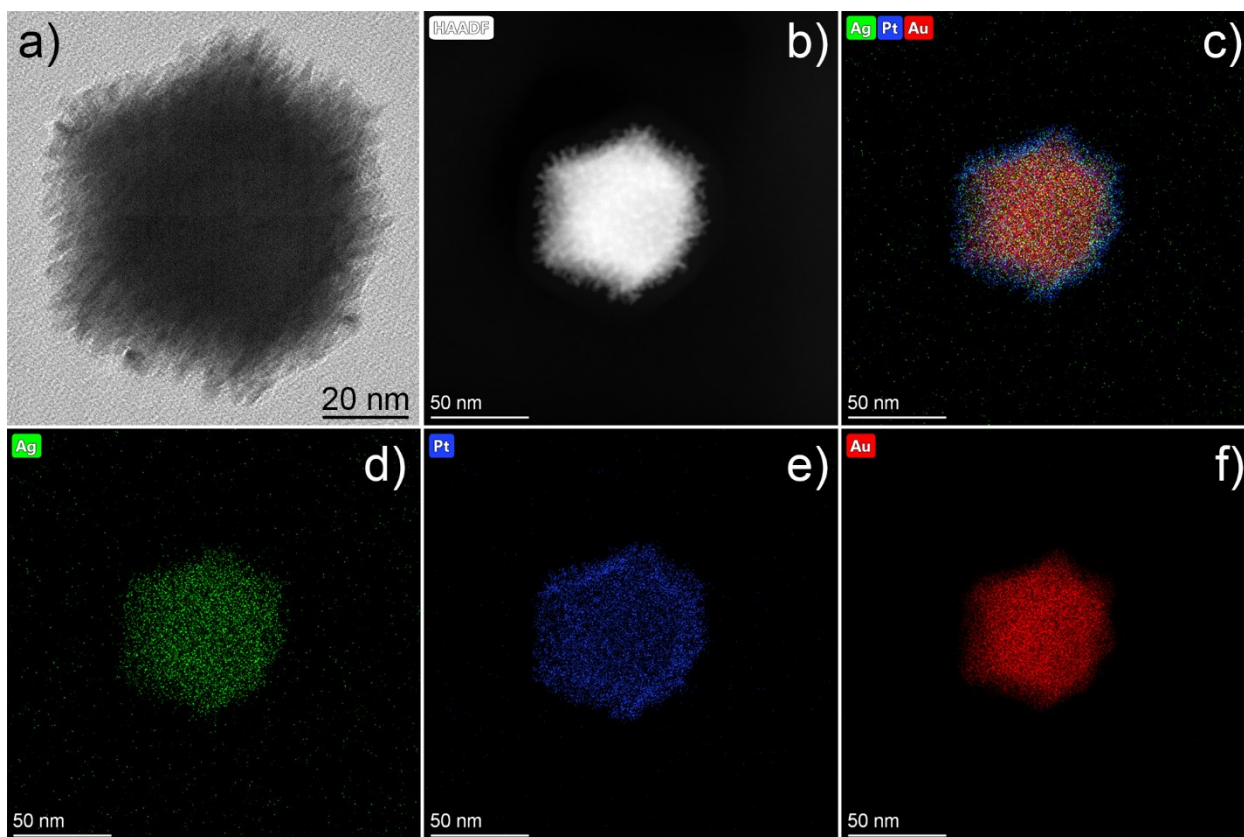

**Figure S1.** Morphology and structural characterizations of Pt/Ag doped TOH Au seeds: a) TEM; b) HAADF-STEM; c-f) EDX-STEM: c) Au+Pt+Ag, d) Ag, e) Pt, f) Au.

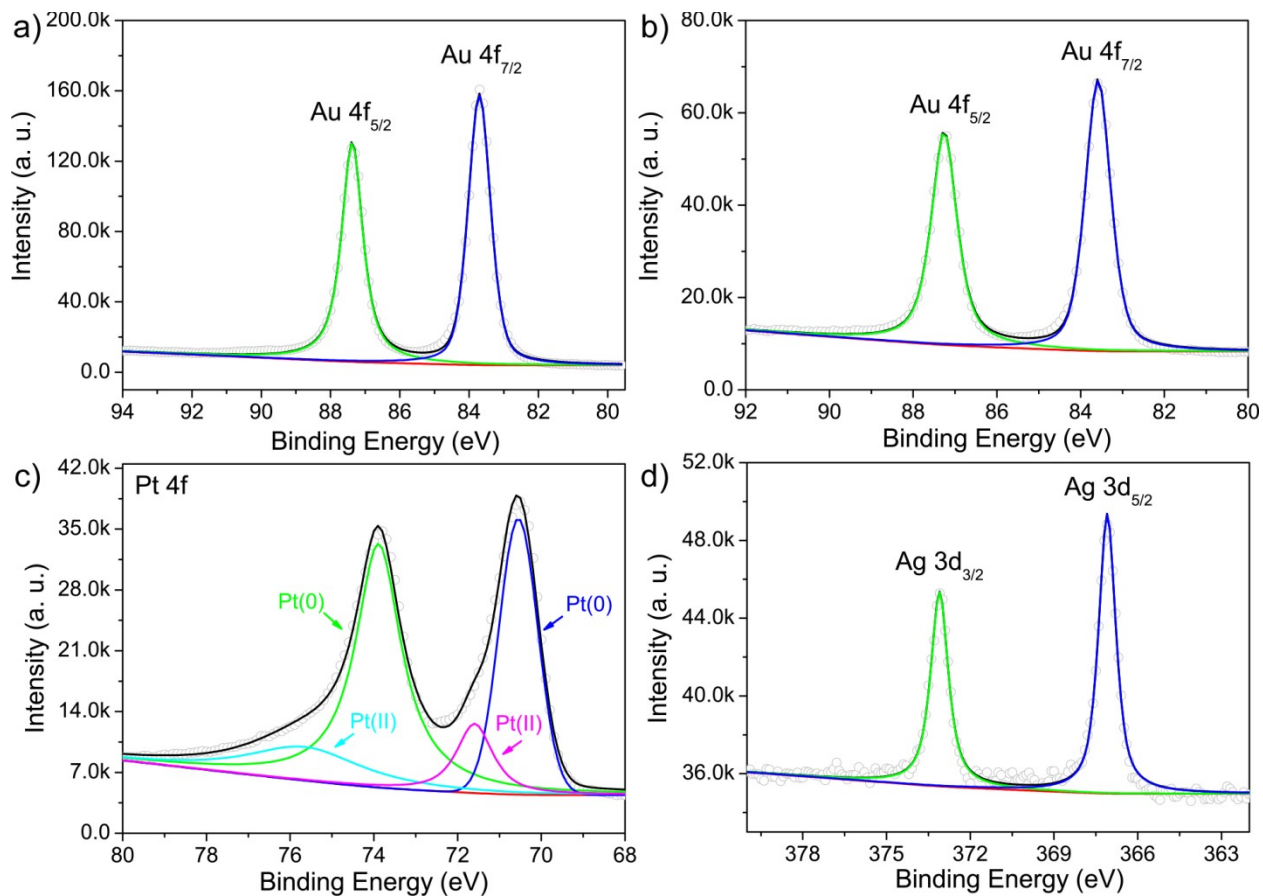

**Figure S2.** High-resolution XPS spectra of a) TOH Au seeds and b-d) Pt/Ag doped TOH Au seeds:

a, b) Au 4f; c) Pt 4f; d) Ag 3d.

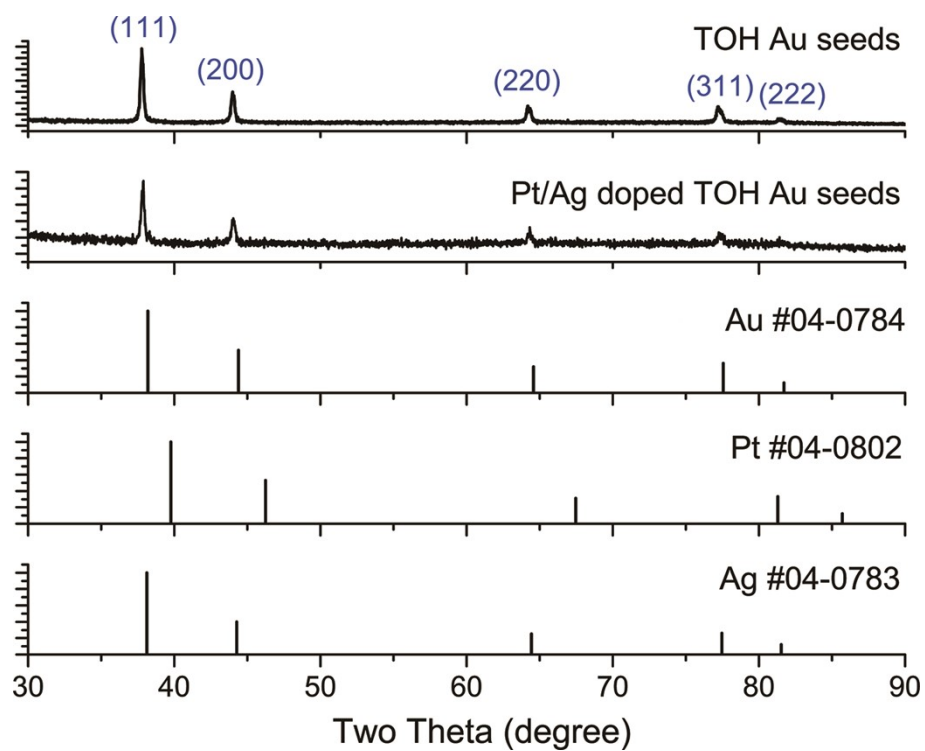

**Figure S3.** XRD patterns of TOH Au seeds and Pt/Ag doped TOH Au seeds.

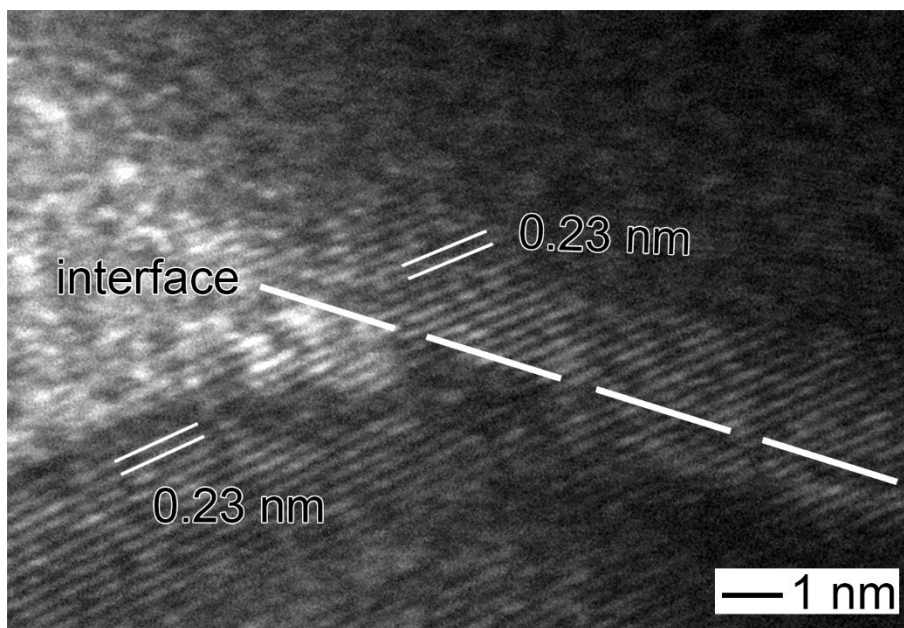

**Figure S4.** HRTEM image of the interface region of an individual Au-based NHJ.

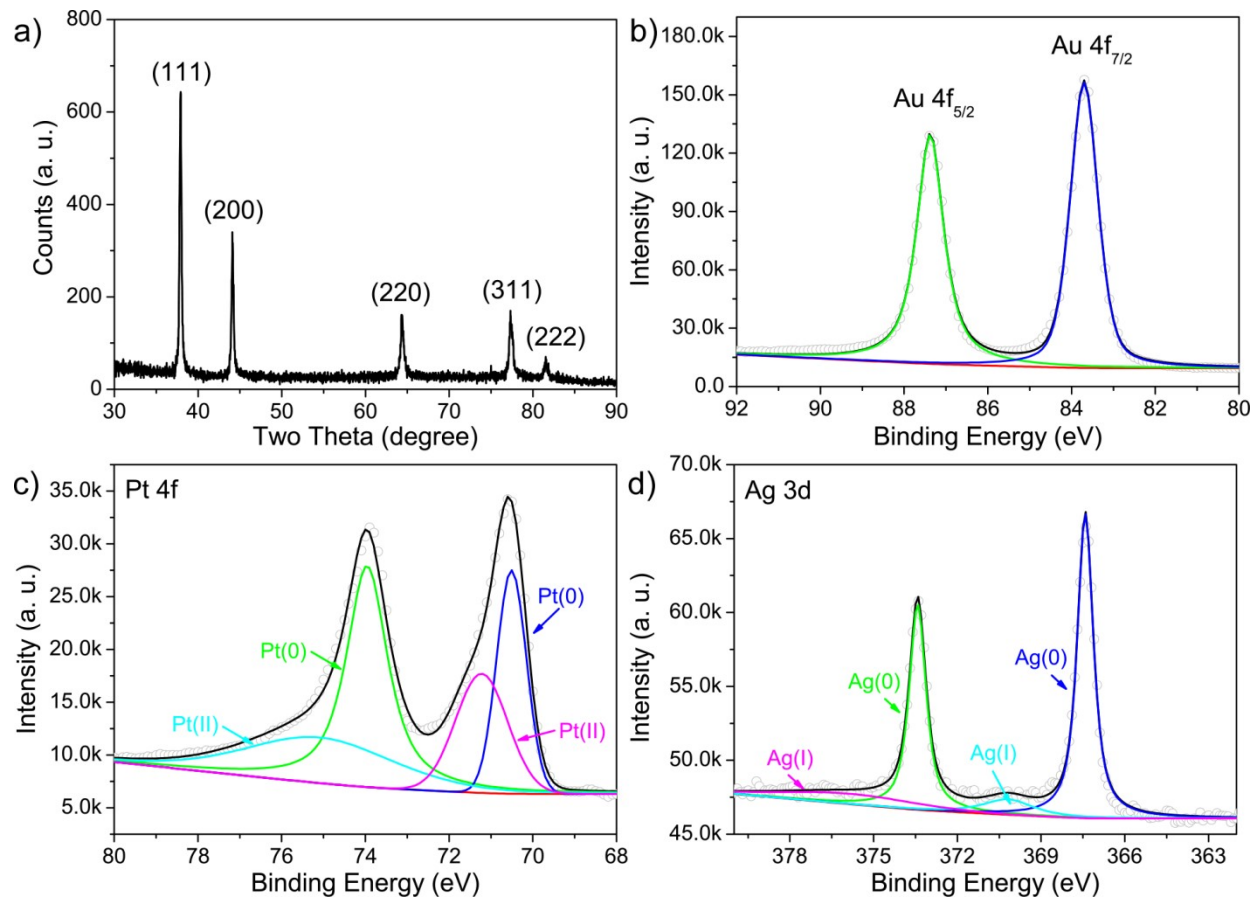

**Figure S5.** a) XRD patterns and b-d) high resolution XPS spectra of Au-based NHJs: b) Au 4f, c) Pt 4f, and d) Ag 3d.

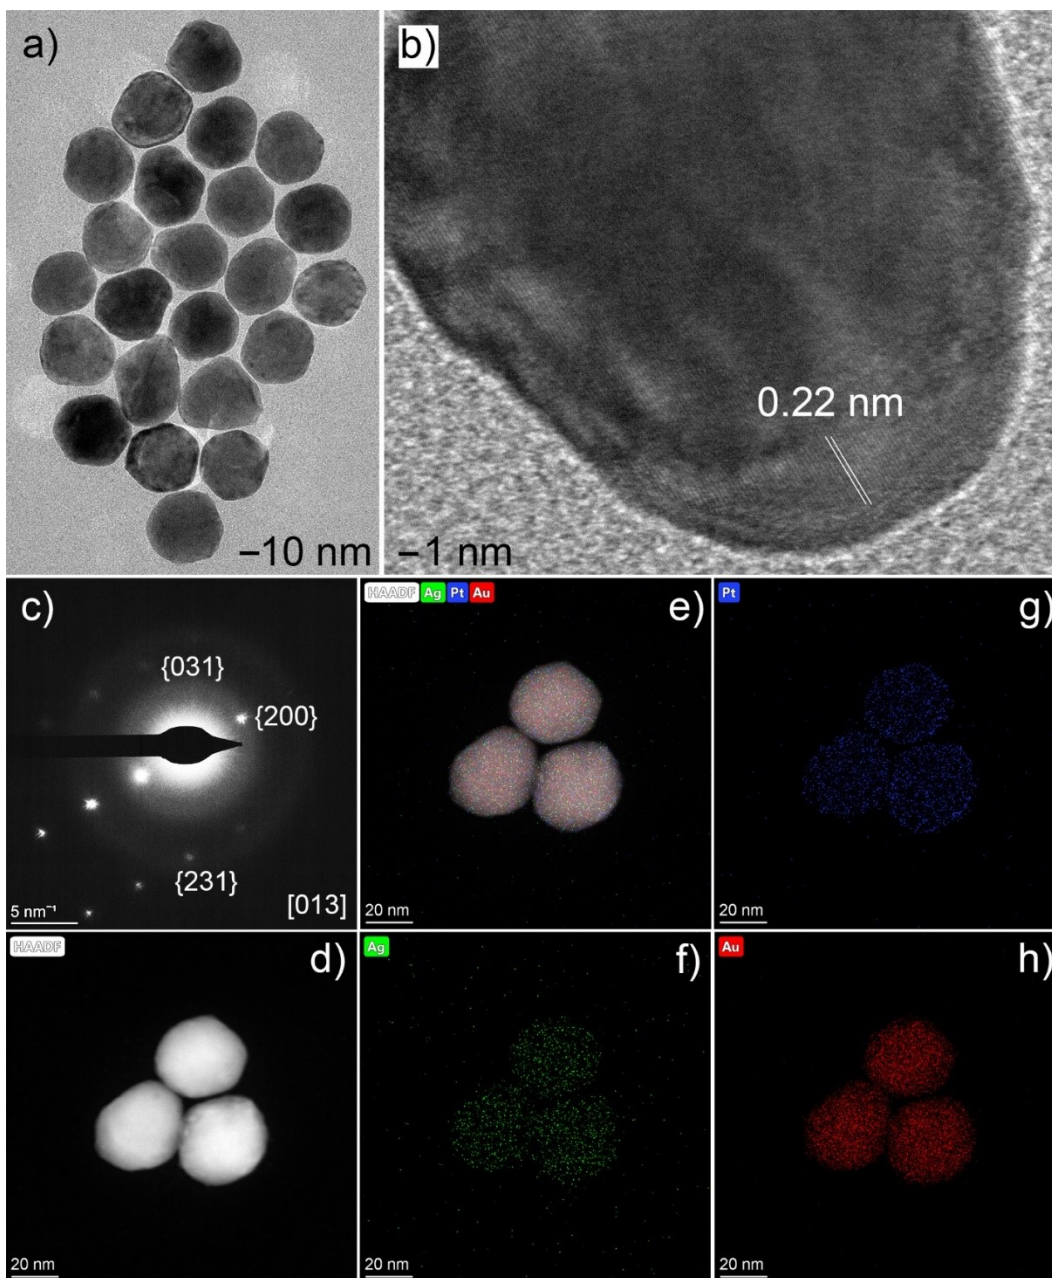

**Figure S6.** Morphology and structural characterizations of products shown in Figure 4d: a) TEM; b) HRTEM; c) SAED; d) HAADF-STEM; e-h) EDX-STEM: e) Au+Pt+Ag, f) Au, g) Pt, h) Au.

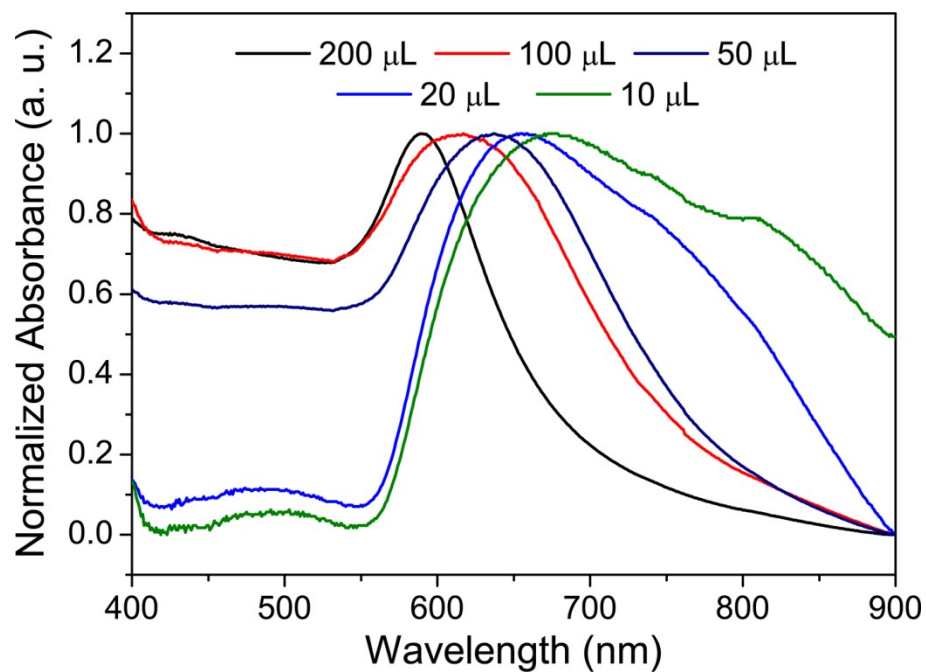

**Figure S7.** UV-vis extinction spectra of Au-based products obtained via the standard procedure, except for the use of 10-nm Au seeds stock solution at different volumes.



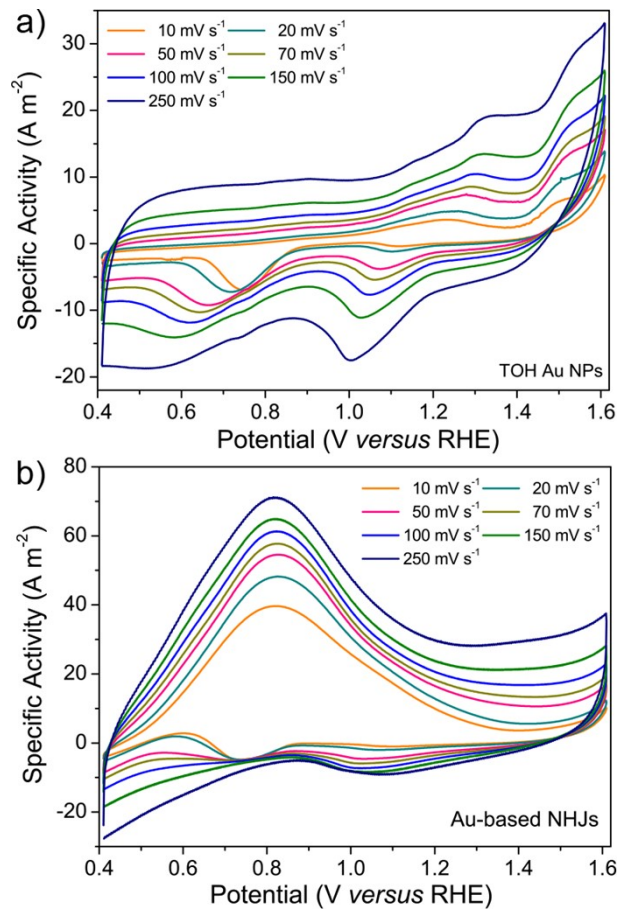

**Figure S8.** CV traces of a) TOH Au NPs/C and b) Au-based NHJs/C recorded in 0.5 M KOH+1 M methanol under different scan rates.

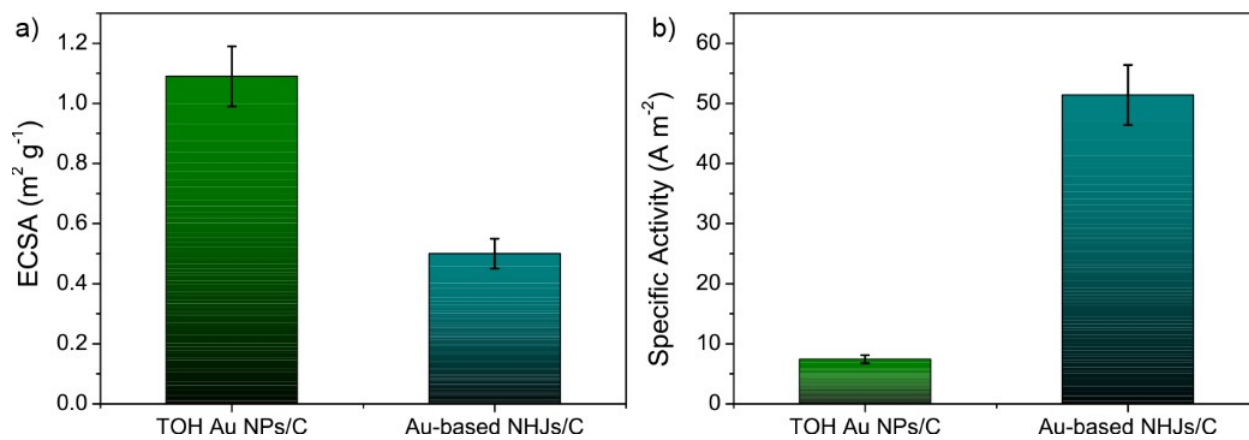

**Figure S9.** Histograms showing the MOR data of a) ECSA and b) specific activity, which were collected *via* multiple parallel tests under the same measurement conditions as described in the experimental section.

**Table S1.** XRD peak positions of TOH Au seeds, Pt/Ag doped TOH Au seeds, Au-based NHJs.

| Sample                   | Diffraction Peak Position |       |       |       |       |
|--------------------------|---------------------------|-------|-------|-------|-------|
|                          | (111)                     | (200) | (220) | (311) | (222) |
| TOH Au seeds             | 38.2                      | 44.4  | 64.6  | 77.6  | 81.5  |
| Pt/Ag doped TOH Au seeds | 38.3                      | 44.4  | 64.7  | 77.8  | /     |
| Au-based NHJs            | 38.3                      | 44.5  | 64.8  | 77.7  | 81.9  |
| Au (JCPDS No. 04-0784)   | 38.2                      | 44.4  | 64.6  | 77.5  | 81.7  |
| Pt (JCPDS No. 04-0802)   | 39.8                      | 46.2  | 67.5  | 81.3  | 85.7  |
| Ag (JCPDS No. 04-0783)   | 38.1                      | 44.3  | 64.4  | 77.5  | 81.5  |

**Table S2.** Statistical size information of Au-based NHJs obtained using different amounts of 10-nm Au seeds.

| Sample    | volume of Au<br>seeds ( $\mu\text{L}$ ) | Part I |               | Part II |               |
|-----------|-----------------------------------------|--------|---------------|---------|---------------|
|           |                                         | d (nm) | $\sigma$ (nm) | d (nm)  | $\sigma$ (nm) |
| Figure 4a | 10                                      | 90.8   | 20.6          | 65.4    | 13.4          |
| Figure 2  | 20                                      | 79.7   | 28.4          | 58.7    | 21.4          |
| Figure 4b | 50                                      | 67.8   | 27.2          | 44.9    | 15.3          |
| Figure 4c | 100                                     | 58.2   | 8.2           | 30.8    | 7.5           |

**Table S3.** LSPR peak positions of Au-based NHJs with different sizes.

| <b>Sample</b>               | <b>LSPR Peak Position</b> |        |
|-----------------------------|---------------------------|--------|
| Au-based NHJs (10 $\mu$ L)  | 676 nm                    | 497 nm |
| Au-based NHJs (20 $\mu$ L)  | 654 nm                    | 486 nm |
| Au-based NHJs (50 $\mu$ L)  | 637 nm                    |        |
| Au-based NHJs (100 $\mu$ L) | 614 nm                    |        |

**Table S4.** Summary of MOR electrocatalytic performance for Au-based electrocatalysts in the present study.

| Electrocatalyst | $E_s^*$<br>(mV) | $E_p^*$<br>(mV) | ECSA<br>( $m^2 g^{-1}$ ) | Specific<br>Activity<br>( $A m^{-2}$ ) | $j(t=3000s)$<br>( $A m^{-2}$ ) |
|-----------------|-----------------|-----------------|--------------------------|----------------------------------------|--------------------------------|
| TOH Au NPs      | 479             | 1280            | 1.09                     | 7.42                                   | 0.10                           |
| Au-based NHJs   | 435             | 825             | 0.500                    | 51.4                                   | 21.7                           |

\* $E_s$ =onset potential vs. RHE;  $E_p$ =peak potential vs. RHE.

**Table S5.** Comparison of MOR electrocatalytic performance of Au-based electrocatalysts among recent studies.

| <b>Electrocatalyst</b>            | <b>Electrolyte</b>               | <b>Scan Rate</b>      | <b>Electrochemical Activity</b> | <b>Ref.</b>  |
|-----------------------------------|----------------------------------|-----------------------|---------------------------------|--------------|
| Trisoctahedron Au nanocrystals    | 0.5 M KOH+1 M CH <sub>3</sub> OH | 20 mV s <sup>-1</sup> | 0.139 mA cm <sup>-2</sup>       | 1            |
| Au micromeshes/PDMS               | 0.5 M KOH+1 M CH <sub>3</sub> OH | 20 mV s <sup>-1</sup> | 0.264 mA cm <sup>-2</sup>       | 2            |
| Dendritic Au                      | 0.1 M KOH+1 M CH <sub>3</sub> OH | 10 mV s <sup>-1</sup> | 0.095 mA cm <sup>-2</sup>       | 3            |
| Nanoporous Au                     | 0.5 M KOH+1 M CH <sub>3</sub> OH | 20 mV s <sup>-1</sup> | 0.088 mA cm <sup>-2</sup>       | 4            |
| Dendritic Au                      | 0.1 M KOH+2 M CH <sub>3</sub> OH | 10 mV s <sup>-1</sup> | 0.056 mA cm <sup>-2</sup>       | 5            |
| Dealloyed nanosponge Au particles | 0.5 M KOH+1 M CH <sub>3</sub> OH | 5 mV s <sup>-1</sup>  | 0.182 mA cm <sup>-2</sup>       | 6            |
| Au-based NHJs                     | 0.5 M KOH+1 M CH <sub>3</sub> OH | 20 mV s <sup>-1</sup> | 5.14 mA cm <sup>-2</sup>        | current work |

## References

1. Y. Song, T. Miao, P. Zhang, C. Bi, H. Xia, D. Wang and X. Tao, *Nanoscale*, 2015, **7**, 8405-8415.
2. J. Sun, F. Wang, Y. Liu, Y. Ni, H. Zhou, C. F. Guo and S. Chen, *RSC Adv.*, 2017, **7**, 22479-22484.
3. X. Han, D. Wang, J. Huang, D. Liu and T. You, *J. Colloid Interf. Sci.*, 2011, **354**, 577-584.
4. J. Zhang, P. Liu, H. Ma and Y. Ding, *J. Phys. Chem. C*, 2007, **111**, 10382-10388.
5. T. Huang, F. Meng and L. Qi, *Langmuir*, 2010, **26**, 7582-7589.
6. G. G. Li, Y. Lin and H. Wang, *Nano Lett.*, 2016, **16**, 7248-7253.
